# Supplementary material
Source: PubMed Central journal article supplement (PMC6768762)
Supplement: NIHMS1535318-supplement-Supplemental_Digital_Content.pdf [file NIHMS1535318-supplement-Supplemental_Digital_Content.pdf]

Supplemental material

eFigure 1. Flowchart of the study population

eFigure 2. Standardized mean differences (covariate balance) between ACEI/ARB versus other antihypertensive agents among Medicare beneficiaries

eTable 1. Codes to identify cancer diagnoses and cancer-related procedures at baseline

eTable 2. Codes to identify any incident cancer outcomes (censoring events) during follow-up

eTable 3. Codes to identify colorectal cancer outcomes

eTable 4. Distribution of baseline characteristics among angiotensin converting enzyme inhibitors and/or angiotensin receptor blockers versus beta blocker initiators from Medicare Current Beneficiary Survey 2006-2011

eTable 5. Distribution of baseline characteristics among angiotensin converting enzyme inhibitors and/or angiotensin receptor blockers versus calcium channel blockers initiators from Medicare Current Beneficiary Survey 2006-2011

eTable 6. Distribution of baseline characteristics among angiotensin converting enzyme inhibitors and/or angiotensin receptor blockers versus thiazide initiators from Medicare Current Beneficiary Survey 2006-2011

eTable 7. Cumulative risks of colorectal cancer at 1, 3 and 5 years of follow up among antihypertensive initiators from Medicare

eTable 8. Time varying incidence of colorectal cancer among antihypertensive initiators over the duration of follow up according to intention-to-treat analyses with no lag

eTable 9. Time varying incidence of colorectal cancer among antihypertensive initiators over the duration of treatment according to as treated analyses with no lag period

eTable 10. Incidence of colorectal cancer among antihypertensive initiators after excluding diabetes mellitus diagnoses at baseline

eTable 11. Incidence of colorectal cancer among antihypertensive initiators after excluding congestive heart failure and myocardial infarction diagnoses at baseline

eTable 12. Incidence of colorectal cancer among angiotensin converting enzyme inhibitors or angiotensin receptor blockers only versus other antihypertensive agents among Medicare beneficiaries

eTable 13. Incidence of colorectal cancer among antihypertensive initiators after allowing prevalent users of other antihypertensive drug classes

eTable 14. Duration of prevalent use of other antihypertensive drug classes by each comparison of ACEI/ARB versus specific active comparator in Medicare beneficiaries

eTable 15. Incidence of colorectal cancer among antihypertensive initiators after varying induction/lag periods, according to intention-to-treat analyses

eTable 16. Incidence of colorectal cancer among antihypertensive initiators after varying induction/lag periods, according to as treated analyses

Figure legends:

eFigure 1. Flowchart of the study population for angiotensin converting enzyme inhibitors (ACEI), angiotensin receptor blockers (ARB), thiazide diuretics (THZ), calcium channel blockers (CCB), beta blockers (BB)

eFigure 2. Standardized mean differences (covariate balance) between ACEI/ARB versus other anti-hypertensive agents among Medicare beneficiaries

eFigure 1.

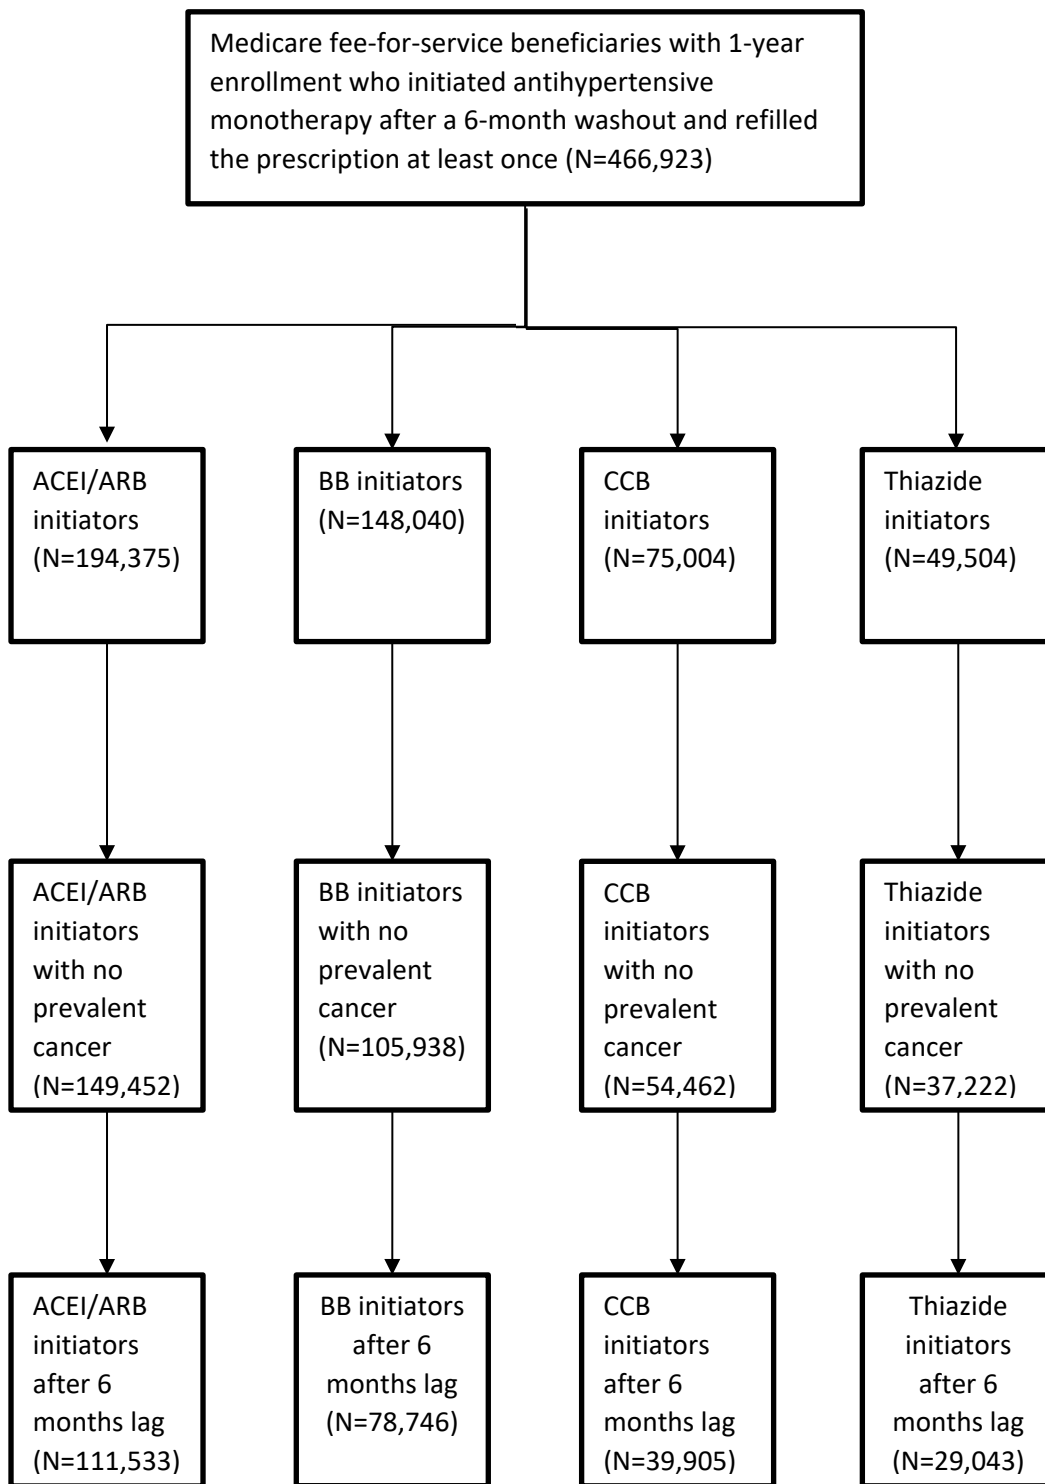

eFigure 2.

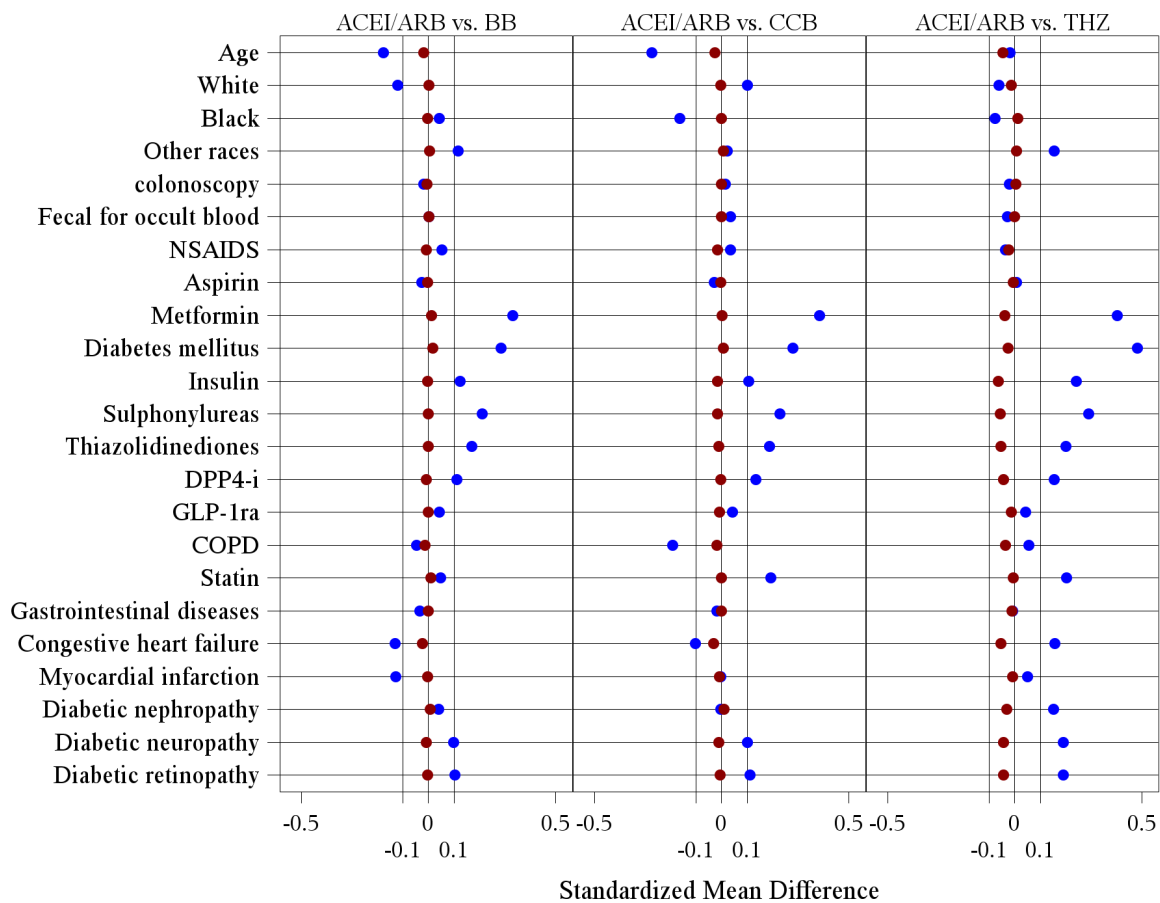

ACEI – Angiotensin converting enzyme inhibitors, ARB – Angiotensin receptor blockers, THZ – Thiazide diuretics, CCB – Calcium channel blockers, BB – Beta blockers, NSAIDs – Non-steroidal anti-inflammatory drugs, DPP4-i – Dipeptidyl peptidase-4 inhibitors, GLP-1ra – Glucagon like peptide-1 receptor agonists, COPD – Chronic obstructive pulmonary disease

eTable 1. Codes used to identify prevalent cancer at baseline

|                                                                                                                                                                                                                                                                                                                                                                           |
|---------------------------------------------------------------------------------------------------------------------------------------------------------------------------------------------------------------------------------------------------------------------------------------------------------------------------------------------------------------------------|
| <p><b>ICD-9-CM diagnostic codes<sup>a</sup>:</b></p> <p>140·0–208·92 (except 173·X), 209·00–209·36, 209·70-209·79, 230·X, 231·X, 233·X, 234·X, 235·X, 236·X, 237·0-237·1, 237·3, 237·5-237·6, 237·7, 237·9, 238·4, 238·6, 238·7 (all but 238·78), 239·6, 239·7, 273·2, 273·3, 277·89, 288·4, 795·06, 795·16, 796·76, V10·X, V87·41, V66·1, V66·2, V67·1, V67·2, V71·1</p> |
| <p><b>HCPCS codes<sup>b</sup>:</b></p> <p>G8371, G8372, G8377, J9999, G0355, G0356, G8376, G8377, G8380, G8381, G8464, G8465, G8518, G8519, G8520, G9050-G9054, G9063-G9067, G9069-G9117, G9131-G9133, G9118-G9130, G9134-G9139, G9714-G9715, G9726, G0256, G0261</p>                                                                                                     |
| <p><b>CPT<sup>c</sup>:</b></p> <p>49220, 3271F, 3272F, 3273F, 3274F, 3300F – 3318F, 3321F, 3370F, 3372F, 3374F, 3376F, 3378F, 3380F, 3382F, 3384F, 3386F, 3388F, 3390F, 4163F, 4164F, 4180F, 4201F</p>                                                                                                                                                                    |

<sup>a</sup> ICD-9-CM International Classification of Disease, Ninth Revision, Clinical Modification

<sup>b</sup> HCPCS Healthcare Common Procedure Coding System

<sup>c</sup> CPT Current Procedural Terminology

eTable 2. Codes used to define any incident cancer during follow up

|                                                                                                                                                                                                                                                                                                                   |
|-------------------------------------------------------------------------------------------------------------------------------------------------------------------------------------------------------------------------------------------------------------------------------------------------------------------|
| <p><b>Any Cancer ICD-9-CM diagnostic codes<sup>a</sup>:</b></p> <p>140·0–208·92 (except 173·X), 209·00 – 209·36, 209·70-209·79,</p> <p>233·0, 236·0, 237·0-237·1, 237·5-237·6, 237·72, 237·9, 238·4, 238·6, 238·7X (all but 238·78),</p> <p>239·6, 239·7, 273·2, 273·3, 277·89, 288·4, 795·06, 795·16, 796·76</p> |
|-------------------------------------------------------------------------------------------------------------------------------------------------------------------------------------------------------------------------------------------------------------------------------------------------------------------|

<sup>a</sup> ICD-9-CM International Classification of Disease, Ninth Revision, Clinical Modification

eTable 3. ICD-9-CM codes used to identify colorectal cancer outcomes

---

| ICD-9-CM codes                            |
|-------------------------------------------|
| 153.xx, 154.0, 154.1, 154.2, 230.3, 230.4 |

---



eTable 4. Distribution of baseline characteristics among angiotensin converting enzyme inhibitors and/or angiotensin receptor blockers versus beta blocker initiators from Medicare Current Beneficiary Survey 2006-2011<sup>a</sup>

|                            | Before weighting <sup>b</sup> |                         | After weighting <sup>b</sup> |                  | Absolute standardized mean difference <sup>c</sup> |       |
|----------------------------|-------------------------------|-------------------------|------------------------------|------------------|----------------------------------------------------|-------|
|                            | ACEI/ARB (N=285, %)           | Beta blocker (N=288, %) | ACEI/ARB (%)                 | Beta blocker (%) |                                                    |       |
| Age                        |                               |                         |                              |                  |                                                    |       |
|                            | 66-70                         | 29                      | 23                           | 29               | 29                                                 | 0.003 |
|                            | 71-75                         | 19                      | 21                           | 19               | 21                                                 | 0.03  |
|                            | 76-80                         | 21                      | 19                           | 21               | 19                                                 | 0.05  |
|                            | 81-85                         | 16                      | 21                           | 16               | 19                                                 | 0.08  |
|                            | 85+                           | 15                      | 16                           | 15               | 12                                                 | 0.06  |
| Sex                        |                               |                         |                              |                  |                                                    |       |
|                            | Male                          | 44                      | 39                           | 44               | 44                                                 | 0.01  |
| Race                       |                               |                         |                              |                  |                                                    |       |
|                            | White                         | 85                      | 89                           | 85               | 87                                                 | 0.03  |
|                            | Black                         | 7.7                     | 6.3                          | 7.7              | 6.6                                                | 0.04  |
|                            | Others                        | 7.0                     | 5.2                          | 7.0              | 6.9                                                | 0.003 |
| Cardiovascular diseases    |                               | 7.4                     | 8.0                          | 7.4              | 6.8                                                | 0.02  |
| COPD                       |                               | 14                      | 9.0                          | 14               | 16                                                 | 0.05  |
| Gastrointestinal diseases  |                               | <11 <sup>e</sup>        | <11 <sup>e</sup>             | <11 <sup>e</sup> | <11 <sup>e</sup>                                   | 0.005 |
| No. of office visits       |                               |                         |                              |                  |                                                    |       |
|                            | 0                             | 62                      | 62                           | 62               | 60                                                 | 0.05  |
|                            | 1 to 3                        | 19                      | 19                           | 19               | 19                                                 | 0.006 |
|                            | >3                            | 19                      | 19                           | 19               | 21                                                 | 0.05  |
| No. of hospital admissions |                               | 11                      | 21                           | 11               | 10                                                 | 0.03  |
| Colonoscopy + FOBT         |                               | <11 <sup>e</sup>        | <11 <sup>e</sup>             | <11 <sup>e</sup> | <11 <sup>e</sup>                                   | 0.005 |
| Statins                    |                               | 31                      | 32                           | 31               | 30                                                 | 0.02  |
| NSAIDS <sup>d</sup>        |                               | 13                      | 17                           | 13               | 14                                                 | 0.006 |
| Aspirin <sup>d</sup>       |                               | <11 <sup>e</sup>        | <11 <sup>e</sup>             | <11 <sup>e</sup> | <11 <sup>e</sup>                                   | 0.03  |
| Smoking                    |                               |                         |                              |                  |                                                    |       |
|                            | Never                         | 44                      | 46                           | 44               | 43                                                 | 0.03  |
|                            | Former                        | 10                      | 8.2                          | 10               | 10                                                 | 0.03  |
|                            | Current                       | 46                      | 45                           | 46               | 47                                                 | 0.02  |
| Body mass index            |                               |                         |                              |                  |                                                    |       |
|                            | <25                           | 39                      | 43                           | 39               | 42                                                 | 0.08  |
|                            | 25-30                         | 43                      | 40                           | 43               | 39                                                 | 0.07  |

|  | >30 | 18 | 17 | 18 | 19 | 0.02 |
|--|-----|----|----|----|----|------|
|--|-----|----|----|----|----|------|

ACEI – Angiotensin Converting Enzyme Inhibitors, ARB – Angiotensin Receptor Blockers, BB – beta blockers, COPD – chronic obstructive pulmonary diseases, FOBT – fecal for occult blood, NSAID – Non-steroidal anti-inflammatory drugs

<sup>a</sup> Baseline was defined as a 12-month period before the first prescription date during which covariates were assessed (6 months for comedications). Drug initiators were identified after a 6-month drug-free period.

<sup>b</sup> Propensity score weighting was implemented by standardized morbidity ratio weighting, where every patient was weighted to reflect covariate distributions in the exposed population (ACEI/ARB). Covariates in the propensity score estimation included all the variables in this eTable except smoking and body mass index. The intent of the eTable is to show that potential confounders such as smoking and body mass index are balanced between our exposure groups (therefore less chance of confounding) even though they are unmeasured in the main cohorts.

<sup>c</sup> Absolute standardized mean difference was obtained by finding the absolute difference between the proportions in each comparison group divided by the standard deviation, and it is a measure of the balance of covariate distributions after propensity score weighting.

<sup>d</sup> NSAIDs and Aspirin use might not be captured well in the claims data since most of these agents are available over the counter.

<sup>e</sup> No cell size <11 is reported according to the data user agreement with the Center for Medicare and Medicaid Services

eTable 5. Distribution of baseline characteristics among angiotensin converting enzyme inhibitors and/or angiotensin receptor blockers versus calcium channel blocker initiators, from Medicare Current Beneficiary Survey 2006-2011<sup>a</sup>

|                            |                               | Before weighting <sup>b</sup> |                  | After weighting <sup>b</sup> |                  | Absolute standardized mean difference <sup>c</sup> |
|----------------------------|-------------------------------|-------------------------------|------------------|------------------------------|------------------|----------------------------------------------------|
|                            |                               | ACEI/ARB (N=419, %)           | CCB (N=146, %)   | ACEI/ARB (%)                 | CCB (%)          |                                                    |
| Age (Mean, SD)             |                               | 76.9 (7.4)                    | 80.3 (8.2)       | 76.9 (7.4)                   | 77.1 (8.4)       | 0.03                                               |
| Sex                        |                               |                               |                  |                              |                  |                                                    |
|                            | Male                          | 46                            | 50               | 46                           | 50               | 0.08                                               |
| Race                       |                               |                               |                  |                              |                  |                                                    |
|                            | White                         | 83                            | 77               | 83                           | 83               | 0.008                                              |
|                            | Black                         | 8.3                           | 9.6              | 8.3                          | <11 <sup>e</sup> | 0.04                                               |
|                            | Others                        | 8.4                           | 13               | 8.4                          | 9.7              | 0.05                                               |
| Diabetes mellitus          |                               | 21                            | 15               | 21                           | 27               | 0.09                                               |
|                            | Insulin                       | 6.2                           | <11 <sup>e</sup> | 6.2                          | <11 <sup>e</sup> | 0.07                                               |
|                            | Oral anti-hyperglycemic drugs | 16                            | <11 <sup>e</sup> | 16                           | 14               | 0.06                                               |
|                            | Diabetes complications        | 5.0                           | <11 <sup>e</sup> | 5.0                          | <11 <sup>e</sup> | 0.06                                               |
|                            | Cardiovascular diseases       | 11                            | 14               | 11                           | 12               | 0.04                                               |
|                            | COPD                          | 15                            | 17               | 15                           | 13               | 0.08                                               |
|                            | Gastrointestinal diseases     | <11 <sup>e</sup>              | <11 <sup>e</sup> | <11 <sup>e</sup>             | <11 <sup>e</sup> | 0.09                                               |
| No. of office visits       |                               |                               |                  |                              |                  |                                                    |
|                            | 0                             | 60                            | 62               | 61                           | 62               | 0.03                                               |
|                            | 1 to 3                        | 19                            | 16               | 19                           | 16               | 0.08                                               |
|                            | >3                            | 21                            | 22               | 20                           | 22               | 0.03                                               |
| No. of hospital admissions |                               | 14                            | 26               | 14                           | 15               | 0.05                                               |
|                            | Colonoscopy + FOBT            | 4.8                           | <11 <sup>e</sup> | 4.8                          | <11 <sup>e</sup> | 0.04                                               |
|                            | Statins                       | 35                            | 26               | 35                           | 37               | 0.04                                               |
|                            | NSAIDS <sup>d</sup>           | 14                            | 13               | 14                           | 14               | 0.02                                               |
|                            | Aspirin <sup>d</sup>          | 1.7                           | <11 <sup>e</sup> | 1.7                          | <11 <sup>e</sup> | 0.02                                               |
| Smoking                    |                               |                               |                  |                              |                  |                                                    |
|                            | Never                         | 44                            | 40               | 44                           | 40               | 0.07                                               |
|                            | Former                        | 11                            | 12               | 11                           | 12               | 0.05                                               |
|                            | Current                       | 45                            | 48               | 45                           | 48               | 0.06                                               |
| Body mass index            |                               |                               |                  |                              |                  |                                                    |
|                            | <25                           | 35                            | 40               | 35                           | 36               | 0.002                                              |
|                            | 25-30                         | 43                            | 43               | 43                           | 41               | 0.04                                               |
|                            | >30                           | 22                            | 17               | 22                           | 23               | 0.008                                              |

ACEI – Angiotensin Converting Enzyme Inhibitors, ARB – Angiotensin Receptor Blockers, CCB – calcium channel blockers, COPD – chronic obstructive pulmonary diseases, FOBT – fecal for occult blood, NSAID – Non-steroidal anti-inflammatory drugs

<sup>a</sup> Baseline was defined as a 12-month period before the first prescription date during which covariates were assessed (6 months for comedications). Drug initiators were identified after a 6-month drug-free period.

<sup>b</sup> Propensity score weighting was implemented by standardized morbidity ratio weighting, where every patient was weighted to reflect covariate distributions in the exposed population (ACEI/ARB). Covariates in the propensity score estimation included all the variables in this eTable except smoking and body mass index. The intent of the eTable is to show that potential confounders such as smoking and body mass index are balanced between our exposure groups (therefore less chance of confounding) even though they are unmeasured in the main cohorts.

<sup>c</sup> Absolute standardized mean difference was obtained by finding the absolute difference between the proportions in each comparison group divided by the standard deviation, and it is a measure of the balance of covariate distributions after propensity score weighting.

<sup>d</sup> NSAIDs and Aspirin use might not be captured well in the claims data since most of these agents are available over the counter.

<sup>e</sup> No cell size <11 is reported according to the data user agreement with the Center for Medicare and Medicaid Services

eTable 6. Distribution of baseline characteristics among angiotensin converting enzyme inhibitors and/or angiotensin receptor blockers versus thiazide initiators from Medicare Current Beneficiary Survey 2006-2011<sup>a</sup>

|                            | Before weighting <sup>b</sup> |                  | After weighting <sup>b</sup> |                  | Absolute standardized mean difference <sup>c</sup> |       |
|----------------------------|-------------------------------|------------------|------------------------------|------------------|----------------------------------------------------|-------|
|                            | ACEI/ARB (N=285, %)           | THZ (N=124, %)   | ACEI/ARB (%)                 | THZ (%)          |                                                    |       |
| Age                        |                               |                  |                              |                  |                                                    |       |
|                            | 66-70                         | 29               | 25                           | 29               | 27                                                 | 0.03  |
|                            | 71-75                         | 19               | 26                           | 19               | 19                                                 | 0.02  |
|                            | 76-80                         | 21               | 15                           | 21               | 19                                                 | 0.04  |
|                            | 81-85                         | 16               | 18                           | 16               | 18                                                 | 0.06  |
|                            | 85+                           | 15               | 16                           | 15               | 17                                                 | 0.04  |
| Sex                        |                               |                  |                              |                  |                                                    |       |
|                            | Male                          | 44               | 36                           | 44               | 43                                                 | 0.03  |
| Race                       |                               |                  |                              |                  |                                                    |       |
|                            | White                         | 85               | 88                           | 85               | 86                                                 | 0.01  |
|                            | Black                         | 7.7              | <11 <sup>e</sup>             | 7.7              | <11 <sup>e</sup>                                   | 0.02  |
|                            | Others                        | 7.0              | <11 <sup>e</sup>             | 7.0              | <11 <sup>e</sup>                                   | 0.03  |
| Cardiovascular diseases    |                               | 7.4              | <11 <sup>e</sup>             | 7.4              | 7.6                                                | 0.009 |
| COPD                       |                               | 14               | 11                           | 14               | 12                                                 | 0.08  |
| Gastrointestinal diseases  |                               | <11 <sup>e</sup> | <11 <sup>e</sup>             | <11 <sup>e</sup> | <11 <sup>e</sup>                                   | 0.04  |
| No. of office visits       |                               |                  |                              |                  |                                                    |       |
|                            | 0                             | 62               | 64                           | 62               | 67                                                 | 0.09  |
|                            | 1 to 3                        | 19               | 20                           | 19               | 18                                                 | 0.02  |
|                            | >3                            | 19               | 16                           | 19               | 15                                                 | 0.1   |
| No. of hospital admissions |                               | 11               | <11 <sup>e</sup>             | 11               | <11 <sup>e</sup>                                   | 0.07  |
| Colonoscopy + FOBT         |                               | <11 <sup>e</sup> | <11 <sup>e</sup>             | <11 <sup>e</sup> | <11 <sup>e</sup>                                   | 0.001 |
| Statins                    |                               | 31               | 23                           | 31               | 29                                                 | 0.05  |
| NSAIDS <sup>d</sup>        |                               | 13               | 18                           | 13               | 14                                                 | 0.03  |
| Aspirin <sup>d</sup>       |                               | <11 <sup>e</sup> | <11 <sup>e</sup>             | <11 <sup>e</sup> | <11 <sup>e</sup>                                   | 0.005 |
| Smoking                    |                               |                  |                              |                  |                                                    |       |
|                            | Never                         | 44               | 42                           | 44               | 42                                                 | 0.01  |
|                            | Former                        | 10               | <11 <sup>e</sup>             | 10               | <11 <sup>e</sup>                                   | 0.1   |
|                            | Current                       | 46               | 52                           | 46               | 51                                                 | 0.1   |
| Body mass index            |                               |                  |                              |                  |                                                    |       |
|                            | <25                           | 39               | 36                           | 39               | 34                                                 | 0.1   |
|                            | 25-30                         | 43               | 42                           | 43               | 43                                                 | 0.04  |
|                            | >30                           | 18               | 22                           | 18               | 23                                                 | 0.1   |

---

ACEI – Angiotensin Converting Enzyme Inhibitors, ARB – Angiotensin Receptor Blockers, THZ – thiazide diuretics, COPD – chronic obstructive pulmonary diseases, FOBT – fecal for occult blood, NSAID – Non-steroidal anti-inflammatory drugs

<sup>a</sup> Baseline was defined as a 12-month period before the first prescription date during which covariates were assessed (6 months for comedications). Drug initiators were identified after a 6-month drug-free period.

<sup>b</sup> Propensity score weighting was implemented by standardized morbidity ratio weighting, where every patient was weighted to reflect covariate distributions in the exposed population (ACEI/ARB). Covariates in the propensity score estimation include all the variables in this eTable except smoking and body mass index. The intent of the eTable is to show that potential confounders such as smoking and body mass index are balanced between our exposure groups (therefore less chance of confounding) even though they are unmeasured in the main cohorts.

<sup>c</sup> Absolute standardized mean difference was obtained by finding the absolute difference between the proportions in each comparison group divided by the standard deviation, and it is a measure of the balance of covariate distributions after propensity score weighting.

<sup>d</sup> NSAIDs and Aspirin use might not be captured well in the claims data since most of these agents are available over the counter.

<sup>e</sup> No cell size <11 is reported according to the data user agreement with the Center for Medicare and Medicaid Services

eTable 7. Cumulative risks of colorectal cancer at 1, 3 and 5 years of follow up among antihypertensive initiators from Medicare<sup>a</sup>

| Drugs Comparison                                     | Duration of follow up | Drugs    | Cumulative risks (per 1,000) | RD per 1,000 (95% CI) |                    |
|------------------------------------------------------|-----------------------|----------|------------------------------|-----------------------|--------------------|
| <b>Intention-to-treat analyses with 6 months lag</b> |                       |          |                              |                       |                    |
| ACEI/ARB vs. BB                                      | 1 year                | ACEI/ARB | 1.8                          | -0.63 (-1.2, -0.08)   |                    |
|                                                      |                       | BB       | 2.5                          |                       |                    |
|                                                      | 3 years               | ACEI/ARB | 6.1                          |                       | -0.28 (-1.3, 0.78) |
|                                                      |                       | BB       | 6.4                          |                       |                    |
|                                                      | 5 years               | ACEI/ARB | 10                           |                       | 1.4 (-0.27, 2.9)   |
|                                                      |                       | BB       | 8.9                          |                       |                    |
| ACEI/ARB vs. CCB                                     | 1 year                | ACEI/ARB | 1.8                          | 0.08 (-0.51, 0.66)    |                    |
|                                                      |                       | CCB      | 1.8                          |                       |                    |
|                                                      | 3 years               | ACEI/ARB | 6.2                          |                       | 1.2 (0.07, 2.3)    |
|                                                      |                       | CCB      | 4.9                          |                       |                    |
|                                                      | 5 years               | ACEI/ARB | 10                           |                       | 1.7 (0.35, 3.8)    |
|                                                      |                       | CCB      | 8.5                          |                       |                    |
| ACEI/ARB vs. THZ                                     | 1 year                | ACEI/ARB | 1.8                          | -0.20 (-1.10, 0.71)   |                    |
|                                                      |                       | THZ      | 2.0                          |                       |                    |
|                                                      | 3 years               | ACEI/ARB | 6.2                          |                       | 0.53 (-1.0, 2.1)   |
|                                                      |                       | THZ      | 5.6                          |                       |                    |
|                                                      | 5 years               | ACEI/ARB | 10                           |                       | 0.35 (-2.5, 3.2)   |
|                                                      |                       | THZ      | 9.8                          |                       |                    |
| <b>As treated analyses with 6 months lag</b>         |                       |          |                              |                       |                    |
| ACEI/ARB vs. BB                                      | 1 year                | ACEI/ARB | 1.9                          | -0.43 (-1.1, 0.20)    |                    |
|                                                      |                       | BB       | 2.3                          |                       |                    |
|                                                      | 3 years               | ACEI/ARB | 7.2                          |                       | 1.6 (-0.25, 3.4)   |
|                                                      |                       | BB       | 5.6                          |                       |                    |

|                  |         |          |     |                      |
|------------------|---------|----------|-----|----------------------|
|                  | 5 years | ACEI/ARB | 11  | 3.6 (0.52, 6.6)      |
|                  |         | BB       | 6.7 |                      |
| ACEI/ARB vs. CCB | 1 year  | ACEI/ARB | 1.8 | 0.0018 (-0.75, 0.76) |
|                  |         | CCB      | 1.8 |                      |
|                  | 3 years | ACEI/ARB | 7.1 | 1.6 (-0.45, 3.7)     |
|                  |         | CCB      | 5.5 |                      |
|                  | 5 years | ACEI/ARB | 11  | 0.86 (-4.3, 5.9)     |
|                  |         | CCB      | 10  |                      |
| ACEI/ARB vs. THZ | 1 year  | ACEI/ARB | 1.8 | -1.0 (-2.8, 0.74)    |
|                  |         | THZ      | 2.9 |                      |
|                  | 3 years | ACEI/ARB | 7.5 | 0.41 (-3.1, 3.9)     |
|                  |         | THZ      | 7.1 |                      |
|                  | 5 years | ACEI/ARB | 12  | 0.12 (-6.5, 6.7)     |
|                  |         | THZ      | 11  |                      |

---

ACEI – Angiotensin Converting Enzyme Inhibitors, ARB – Angiotensin Receptor Blockers, THZ – Thiazide diuretics, CCB – Calcium Channel Blockers, BB – Beta Blockers, RD – risk differences, CI – confidence intervals



eTable 8. Time varying incidence of colorectal cancer among antihypertensive initiators over the duration of follow up according to intention-to-treat analyses with no lag<sup>a</sup>

| Duration of follow up              | No. of events <sup>b</sup> | Total sample size <sup>b</sup> | Incidence rates (95% CI) <sup>c</sup> | Weighted HR (95% CI) <sup>d</sup> |
|------------------------------------|----------------------------|--------------------------------|---------------------------------------|-----------------------------------|
| <b>0 to 6 months<sup>e</sup></b>   |                            |                                |                                       |                                   |
| ACEI/ARB                           | 139                        | 128,340                        | 2.4 (2.0-2.8)                         | 0.8 (0.6, 1.1)                    |
| BB                                 | 119                        | 91,399                         | 2.9 (2.3-3.6)                         | 1.0                               |
| ACEI/ARB                           | 139                        | 128,340                        | 2.4 (2.0-2.8)                         | 0.8 (0.6, 1.2)                    |
| CCB                                | 60                         | 46,932                         | 2.8 (2.1-3.7)                         | 1.0                               |
| ACEI/ARB                           | 138                        | 128,320                        | 2.3 (2.0, 2.8)                        | 1.2 (0.8, 1.9)                    |
| THZ                                | 29                         | 33,427                         | 1.9 (1.2, 2.9)                        | 1.0                               |
| <b>6 to 12 months<sup>e</sup></b>  |                            |                                |                                       |                                   |
| ACEI/ARB                           | 98                         | 111,584                        | 1.9 (1.5-2.3)                         | 0.8 (0.6, 1.2)                    |
| BB                                 | 83                         | 78,676                         | 2.3 (1.7-3.0)                         | 1.0                               |
| ACEI/ARB                           | 98                         | 111,584                        | 1.9 (1.5-2.3)                         | 1.0 (0.6, 1.7)                    |
| CCB                                | 34                         | 40,125                         | 1.8 (1.2-2.9)                         | 1.0                               |
| ACEI/ARB                           | 96                         | 111,708                        | 1.8 (1.5, 2.3)                        | 1.3 (0.8, 2.1)                    |
| THZ                                | 19                         | 29,434                         | 1.4 (0.9, 2.2)                        | 1.0                               |
| <b>12 to 24 months<sup>e</sup></b> |                            |                                |                                       |                                   |
| ACEI/ARB                           | 160                        | 95,377                         | 1.9 (1.7-2.3)                         | 0.8 (0.7, 1.1)                    |
| BB                                 | 132                        | 66,977                         | 2.3 (1.9-2.8)                         | 1.0                               |
| ACEI/ARB                           | 160                        | 95,377                         | 1.9 (1.7-2.3)                         | 1.2 (0.9, 1.7)                    |
| CCB                                | 46                         | 33,736                         | 1.6 (1.2-2.2)                         | 1.0                               |
| ACEI/ARB                           | 157                        | 95,555                         | 1.9 (1.6, 2.2)                        | 0.9 (0.6, 1.5)                    |
| THZ                                | 44                         | 25,700                         | 2.0 (1.3, 3.0)                        | 1.0                               |
| <b>24 to 36 months<sup>e</sup></b> |                            |                                |                                       |                                   |
| ACEI/ARB                           | 118                        | 69,693                         | 2.0 (1.7-2.4)                         | 1.0 (0.8, 1.4)                    |
| BB                                 | 78                         | 48,622                         | 1.9 (1.5-2.5)                         | 1.0                               |

|                                      |     |        |                |                |
|--------------------------------------|-----|--------|----------------|----------------|
| ACEI/ARB                             | 118 | 69,693 | 2.0 (1.7-2.4)  | 1.1 (0.8, 1.7) |
| CCB                                  | 35  | 24,067 | 1.8 (1.3-2.5)  | 1.0            |
| ACEI/ARB                             | 117 | 70,001 | 2.0 (1.7, 2.4) | 0.9 (0.6, 1.4) |
| THZ                                  | 37  | 19,482 | 2.3 (1.5, 3.4) | 1.0            |
| <b>36 months onwards<sup>e</sup></b> |     |        |                |                |
| ACEI/ARB                             | 157 | 48,378 | 2.2 (1.8-2.5)  | 1.4 (1.0, 1.8) |
| BB                                   | 81  | 33,679 | 1.6 (1.3-2.0)  | 1.0            |
| ACEI/ARB                             | 157 | 48,378 | 2.2 (1.8-2.5)  | 1.3 (0.9, 1.8) |
| CCB                                  | 40  | 16,379 | 1.7 (1.2-2.2)  | 1.0            |
| ACEI/ARB                             | 156 | 48,675 | 2.1 (1.8, 2.5) | 1.1 (0.7, 1.7) |
| THZ                                  | 41  | 13,893 | 2.0 (1.3, 3.0) | 1.0            |

ACEI – Angiotensin Converting Enzyme Inhibitors, ARB – Angiotensin Receptor Blockers, THZ – thiazide diuretics, HR – hazard ratios, CI – confidence intervals, IQR – interquartile range

<sup>a</sup> Intention-to-treat (intention to treat, ITT) analysis is based on follow up until the end of study/enrollment, death, other incident cancer outcomes, whatever comes earlier.

<sup>b</sup> No. of events and sample size were weighted by standardized morbidity ratio weighting, where every patient was weighted to reflect covariate distributions in the ACEI/ARB cohort.

<sup>c</sup> Incidence rates are per 1,000 population.

<sup>d</sup> Weighted hazard ratios were adjusted for baseline covariates in eTable 1. Weighting was implemented by standardized morbidity ratio weighting, where every patient was weighted to reflect covariate distributions in the exposed population (ACEI/ARB).

<sup>e</sup> No lag period was assumed for these analyses. Follow up started from the second prescription date and ended on the date of treatment changes or death or gap in enrollment.

eTable 9. Time varying incidence of colorectal cancer among antihypertensive initiators over the duration of treatment according to as treated analyses with no lag period<sup>a</sup>

| Duration of treatment                | No. of events <sup>b</sup> | Total sample size <sup>b</sup> | Incidence rates (95% CI) <sup>c</sup> | Weighted HR (95% CI) <sup>d</sup> |
|--------------------------------------|----------------------------|--------------------------------|---------------------------------------|-----------------------------------|
| <b>0 to 6 months<sup>e</sup></b>     |                            |                                |                                       |                                   |
| ACEI/ARB                             | 109                        | 128,335                        | 2.2 (1.8, 2.7)                        | 0.8 (0.6, 1.0)                    |
| BB                                   | 98                         | 91,394                         | 2.9 (2.3, 3.7)                        | 1.0                               |
| ACEI/ARB                             | 110                        | 128,335                        | 2.2 (1.8, 2.7)                        | 0.8 (0.5, 1.1)                    |
| CCB                                  | 51                         | 46,932                         | 2.9 (2.1, 4.0)                        | 1.0                               |
| ACEI/ARB                             | 110                        | 128,335                        | 2.2 (1.8, 2.7)                        | 1.2 (0.7, 2.0)                    |
| THZ                                  | 23                         | 33,555                         | 1.9 (1.1, 3.3)                        | 1.0                               |
| <b>6 to 12 months<sup>e</sup></b>    |                            |                                |                                       |                                   |
| ACEI/ARB                             | 48                         | 71,121                         | 1.7 (1.3, 2.3)                        | 0.8 (0.5, 1.2)                    |
| BB                                   | 41                         | 47,160                         | 2.3 (1.5, 3.4)                        | 1.0                               |
| ACEI/ARB                             | 47                         | 72,371                         | 1.7 (1.2, 2.2)                        | 1.1 (0.6, 1.9)                    |
| CCB                                  | 15                         | 25,176                         | 1.5 (0.9, 2.6)                        | 1.0                               |
| ACEI/ARB                             | 48                         | 71,688                         | 1.7 (1.3, 2.3)                        | 1.8 (0.8, 3.9)                    |
| THZ                                  | <11 <sup>f</sup>           | 16,624                         | 1.0 (0.5, 2.1)                        | 1.0                               |
| <b>12 to 24 months<sup>e</sup></b>   |                            |                                |                                       |                                   |
| ACEI/ARB                             | 56                         | 42,781                         | 1.9 (1.4, 2.4)                        | 1.1 (0.7, 1.6)                    |
| BB                                   | 34                         | 27,880                         | 1.8 (1.3, 2.5)                        | 1.0                               |
| ACEI/ARB                             | 60                         | 43,958                         | 1.9 (1.5, 2.5)                        | 1.1 (0.6, 1.9)                    |
| CCB                                  | 19                         | 15,233                         | 1.8 (1.1, 3.0)                        | 1.0                               |
| ACEI/ARB                             | 59                         | 43,157                         | 1.9 (1.5, 2.5)                        | 0.6 (0.3, 1.3)                    |
| THZ                                  | 22                         | 9,685                          | 3.4 (1.5, 7.6)                        | 1.0                               |
| <b>24 months onwards<sup>e</sup></b> |                            |                                |                                       |                                   |
| ACEI/ARB                             | 53                         | 20,423                         | 2.0 (1.5, 2.6)                        | 1.5 (0.9, 2.5)                    |
| BB                                   | 22                         | 13,175                         | 1.3 (0.8, 2.0)                        | 1.0                               |

|          |    |        |                |                |
|----------|----|--------|----------------|----------------|
| ACEI/ARB | 55 | 21,256 | 2.0 (1.5, 2.5) | 0.9 (0.6, 1.5) |
| CCB      | 21 | 7,301  | 2.2 (1.4, 3.3) | 1.0            |
| ACEI/ARB | 61 | 20,656 | 2.3 (1.8, 2.9) | 0.9 (0.4, 2.0) |
| THZ      | 14 | 4,352  | 2.6 (1.2, 6.0) | 1.0            |

---

ACEI – Angiotensin Converting Enzyme Inhibitors, ARB – Angiotensin Receptor Blockers, THZ – thiazide diuretics, CCB – calcium channel blockers, BB – beta blockers, HR – hazard ratios, CI – confidence intervals

<sup>a</sup> As treated (AT) analysis is based on follow up until the end of study/enrollment, death, other incident cancer outcomes, or switching/discontinuation/ augmentation of drugs, whatever comes earlier.

<sup>b</sup> No. of events and sample size were weighted by stabilized standardized morbidity ratio weighting, where every patient was weighted to reflect the covariate distributions in the exposed population.

<sup>c</sup> Incidence rates are per 1,000 population.

<sup>d</sup> Weighted hazard ratios were adjusted for baseline covariates in Table 1. Weighting is implemented by stabilized morbidity ratio weighting, where patients were weighted to reflect the covariate distributions in the ACEI/ARB cohort. ACEI/ARB group was given a weight of 1 and each comparator  $PS/(1-PS) * (1-prev)/prev$ , in which PS is the propensity score and prev is the marginal prevalence (proportion) of ACEI/ARB users in the study population.

<sup>e</sup> No lag period was assumed for these analyses. Follow up started from the second prescription date and the follow up time is stratified into these intervals.

<sup>f</sup> No cell size <11 is reported according to the data user agreement with the center for Medicare and Medicaid Service

eTable 10. Incidence of colorectal cancer among antihypertensive initiators after excluding diabetes mellitus diagnoses at baseline

| Drugs Comparison                                     | No. of events | Total sample size | Follow up years (median, IQR) | Incidence rates <sup>a</sup> | Crude HR (95% CI) | Weighted HR (95% CI) <sup>b</sup> |
|------------------------------------------------------|---------------|-------------------|-------------------------------|------------------------------|-------------------|-----------------------------------|
| <b>Intention-to-treat analyses with 6 months lag</b> |               |                   |                               |                              |                   |                                   |
| ACEI/ARB                                             | 301           | 67,949            | 2.2 (1.0, 3.7)                | 1.8                          | 1.0 (0.8, 1.2)    | 1.0 (0.9, 1.2)                    |
| BB                                                   | 257           | 58,468            | 2.2 (0.9, 3.7)                | 1.8                          | 1.0               | 1.0                               |
| ACEI/ARB                                             | 301           | 67,949            | 2.2 (1.0, 3.7)                | 1.8                          | 0.9 (0.8, 1.1)    | 1.0 (0.8, 1.3)                    |
| CCB                                                  | 131           | 29,547            | 2.0 (0.8, 3.5)                | 1.9                          | 1.0               | 1.0                               |
| ACEI/ARB                                             | 301           | 67,949            | 2.2 (1.0, 3.7)                | 1.8                          | 0.9 (0.8, 1.2)    | 0.9 (0.7, 1.2)                    |
| THZ                                                  | 115           | 23,853            | 2.4 (1.1, 4.0)                | 1.9                          | 1.0               | 1.0                               |
| <b>As treated analyses with 6 months lag</b>         |               |                   |                               |                              |                   |                                   |
| ACEI/ARB                                             | 121           | 65,452            | 0.6 (0.3, 1.4)                | 1.7                          | 0.9 (0.8, 1.3)    | 1.0 (0.8, 1.3)                    |
| BB                                                   | 102           | 56,366            | 0.6 (0.2, 1.3)                | 1.7                          | 1.0               | 1.0                               |
| ACEI/ARB                                             | 119           | 67,587            | 0.6 (0.3, 1.4)                | 1.7                          | 0.9 (0.6, 1.2)    | 0.9 (0.7, 1.4)                    |
| CCB                                                  | 58            | 29,410            | 0.6 (0.2, 1.3)                | 1.9                          | 1.0               | 1.0                               |
| ACEI/ARB                                             | 121           | 67,587            | 0.6 (0.3, 1.4)                | 1.7                          | 0.9 (0.7, 1.4)    | 0.9 (0.6, 1.3)                    |
| THZ                                                  | 41            | 23,702            | 0.5 (0.2, 1.3)                | 1.8                          | 1.0               | 1.0                               |

ACEI – Angiotensin Converting Enzyme Inhibitors, ARB – Angiotensin Receptor Blockers, THZ – Thiazide diuretics, CCB – Calcium Channel Blockers, BB – Beta Blockers, HR – hazard ratios, CI – confidence intervals, IQR – interquartile range

<sup>a</sup> Incidence rates are per 1,000 population.

<sup>b</sup> Weighted hazard ratios were adjusted for baseline covariates in Table 1. Weighting was implemented by standardized morbidity ratio weighting, where every patient was weighted to reflect covariate distributions in the exposed population (ACEI/ARB).

eTable 11. Incidence of colorectal cancer among antihypertensive initiators after excluding congestive heart failure and myocardial infarction diagnoses at baseline

| Drugs comparison                                     | No. of events | Total sample size | Follow up years (median, IQR) | Incidence rates <sup>a</sup> | Crude HR (95% CI) | Weighted HR (95% CI) <sup>b</sup> |
|------------------------------------------------------|---------------|-------------------|-------------------------------|------------------------------|-------------------|-----------------------------------|
| <b>Intention-to-treat analyses with 6 months lag</b> |               |                   |                               |                              |                   |                                   |
| ACEI/ARB                                             | 444           | 98,431            | 2.2 (1.0, 3.7)                | 1.9                          | 1.0 (0.9, 1.2)    | 0.9 (0.8, 1.1)                    |
| BB                                                   | 292           | 65,461            | 2.2 (1.0, 3.7)                | 1.9                          | 1.0               | 1.0                               |
| ACEI/ARB                                             | 444           | 98,431            | 2.2 (1.0, 3.7)                | 1.9                          | 0.9 (0.8, 1.1)    | 1.1 (0.9, 1.4)                    |
| CCB                                                  | 153           | 33,817            | 2.0 (0.9, 3.5)                | 2.0                          | 1.0               | 1.0                               |
| ACEI/ARB                                             | 444           | 98,431            | 2.2 (1.0, 3.7)                | 1.9                          | 1.0 (0.9, 1.3)    | 0.9 (0.7, 1.2)                    |
| THZ                                                  | 125           | 26,992            | 2.4 (1.1, 4.0)                | 1.8                          | 1.0               | 1.0                               |
| <b>As treated analyses with 6 months lag</b>         |               |                   |                               |                              |                   |                                   |
| ACEI/ARB                                             | 198           | 97,883            | 0.6 (0.3, 1.4)                | 1.9                          | 1.1 (0.8, 1.3)    | 1.0 (0.8, 1.3)                    |
| BB                                                   | 119           | 64,796            | 0.5 (0.2, 1.3)                | 1.9                          | 1.0               | 1.0                               |
| ACEI/ARB                                             | 196           | 94,196            | 0.6 (0.3, 1.4)                | 1.9                          | 0.9 (0.7, 1.2)    | 1.1 (0.8, 1.5)                    |
| CCB                                                  | 70            | 33,651            | 0.6 (0.2, 1.4)                | 2.0                          | 1.0               | 1.0                               |
| ACEI/ARB                                             | 196           | 97,883            | 0.6 (0.3, 1.4)                | 1.9                          | 1.1 (0.8, 1.5)    | 0.8 (0.5, 1.2)                    |
| THZ                                                  | 46            | 26,813            | 0.5 (0.2, 1.3)                | 1.8                          | 1.0               | 1.0                               |

ACEI – Angiotensin Converting Enzyme Inhibitors, ARB – Angiotensin Receptor Blockers, THZ – Thiazide diuretics, CCB – Calcium Channel Blockers, BB – Beta Blockers, HR – hazard ratios, CI – confidence intervals, IQR – interquartile range

<sup>a</sup> Incidence rates are per 1,000 population.

<sup>b</sup> Weighted hazard ratios were adjusted for baseline covariates in Table 1. Weighting was implemented by standardized morbidity ratio weighting, where every patient was weighted to reflect covariate distributions in the exposed population (ACEI/ARB).

eTable 12. Incidence of colorectal cancer among angiotensin converting enzyme inhibitors or angiotensin receptor blockers only versus other antihypertensive agents among Medicare beneficiaries

| Drugs Comparison                                     | No. of events | Total sample size | Follow up years (median, IQR) | Incidence rates <sup>a</sup> | Crude HR (95% CI) | Weighted HR (95% CI) <sup>b</sup> |
|------------------------------------------------------|---------------|-------------------|-------------------------------|------------------------------|-------------------|-----------------------------------|
| <b>Intention-to-treat analyses with 6 months lag</b> |               |                   |                               |                              |                   |                                   |
| <b>ACEI vs. other antiHT</b>                         |               |                   |                               |                              |                   |                                   |
| ACEI                                                 | 402           | 82,868            | 2.1 (0.9, 3.6)                | 2.0                          | 1.0 (0.9, 1.2)    | 1.0 (0.9, 1.2)                    |
| BB                                                   | 364           | 78,746            | 2.1 (0.9, 3.6)                | 2.0                          | 1.0               | 1.0                               |
| ACEI                                                 | 402           | 82,868            | 2.1 (0.9, 3.6)                | 2.0                          | 1.0 (0.9, 1.2)    | 1.2 (0.9, 1.5)                    |
| CCB                                                  | 177           | 39,905            | 1.9 (0.8, 3.4)                | 2.0                          | 1.0               | 1.0                               |
| ACEI                                                 | 402           | 82,868            | 2.1 (0.9, 3.6)                | 2.0                          | 1.1 (0.9, 1.4)    | 1.1 (0.8, 1.4)                    |
| THZ                                                  | 138           | 29,043            | 2.4 (1.1, 4.0)                | 1.9                          | 1.0               | 1.0                               |
| <b>ARB vs. other antiHT</b>                          |               |                   |                               |                              |                   |                                   |
| ARB                                                  | 130           | 28,665            | 2.2 (1.0, 3.8)                | 1.9                          | 0.9 (0.8, 1.2)    | 0.9 (0.8, 1.2)                    |
| BB                                                   | 364           | 78,746            | 2.1 (0.9, 3.6)                | 2.0                          | 1.0               | 1.0                               |
| ARB                                                  | 130           | 28,665            | 2.2 (1.0, 3.8)                | 1.9                          | 0.9 (0.7, 1.2)    | 1.1 (0.9, 1.4)                    |
| CCB                                                  | 177           | 39,905            | 1.9 (0.8, 3.4)                | 2.0                          | 1.0               | 1.0                               |
| ARB                                                  | 130           | 28,665            | 2.2 (1.0, 3.8)                | 1.9                          | 1.0 (0.8, 1.3)    | 0.9 (0.7, 1.3)                    |
| THZ                                                  | 138           | 29,043            | 2.1 (1.1, 4.0)                | 1.9                          | 1.0               | 1.0                               |
| <b>As treated analyses with 6 months lag</b>         |               |                   |                               |                              |                   |                                   |
| <b>ACEI vs. other antiHT</b>                         |               |                   |                               |                              |                   |                                   |
| ACEI                                                 | 176           | 94,447            | 0.6 (0.3, 1.4)                | 1.8                          | 1.1 (0.9, 1.4)    | 1.1 (0.8, 1.3)                    |
| BB                                                   | 149           | 90,912            | 0.5 (0.2, 1.3)                | 1.7                          | 1.0               | 1.0                               |
| ACEI                                                 | 171           | 94,447            | 0.6 (0.3, 1.4)                | 1.7                          | 0.9 (0.8, 1.3)    | 1.1 (0.8, 1.5)                    |
| CCB                                                  | 81            | 46,551            | 0.6 (0.2, 1.3)                | 1.7                          | 1.0               | 1.0                               |
| ACEI                                                 | 177           | 94,447            | 0.6 (0.3, 1.4)                | 1.8                          | 1.1 (0.8, 1.5)    | 0.9 (0.5, 1.3)                    |

|                             |     |        |                |     |                |                |
|-----------------------------|-----|--------|----------------|-----|----------------|----------------|
| THZ                         | 52  | 32,528 | 0.5 (0.2, 1.2) | 1.7 | 1.0            | 1.0            |
| <b>ARB vs. other antiHT</b> |     |        |                |     |                |                |
| ARB                         | 50  | 32,271 | 0.6 (0.3, 1.3) | 1.6 | 0.9 (0.7, 1.3) | 0.9 (0.7, 1.3) |
| BB                          | 149 | 90,912 | 0.5 (0.2, 1.3) | 1.7 | 1.0            | 1.0            |
| ARB                         | 59  | 32,271 | 0.6 (0.3, 1.3) | 1.8 | 1.1 (0.8, 1.5) | 1.1 (0.8, 1.6) |
| CCB                         | 81  | 46,551 | 0.6 (0.2, 1.3) | 1.7 | 1.0            | 1.0            |
| ARB                         | 57  | 32,271 | 0.6 (0.3, 1.3) | 1.8 | 1.1 (0.7, 1.6) | 0.9 (0.6, 1.5) |
| THZ                         | 52  | 32,528 | 0.6 (0.2, 1.2) | 1.7 | 1.0            | 1.0            |

ACEI – Angiotensin Converting Enzyme Inhibitors, ARB – Angiotensin Receptor Blockers, THZ – Thiazide diuretics, CCB – Calcium Channel Blockers, BB – Beta Blockers, HR – hazard ratios, CI – confidence intervals, IQR – interquartile range

<sup>a</sup> Incidence rates are per 1,000 population.

<sup>b</sup> Weighted hazard ratios were adjusted for baseline covariates in Table 1. Weighting was implemented by standardized morbidity ratio weighting, where every patient was weighted to reflect covariate distributions in the exposed population (ACEI/ARB).



eTable 13. Incidence of colorectal cancer among antihypertensive initiators after allowing prevalent users of other antihypertensive drug classes<sup>a</sup>

| Drugs Comparison                                     | No. of events | Total sample size | Follow up years (median, IQR) | Incidence rates <sup>b</sup> | Crude HR (95% CI) | Weighted HR (95% CI) <sup>c</sup> |
|------------------------------------------------------|---------------|-------------------|-------------------------------|------------------------------|-------------------|-----------------------------------|
| <b>Intention-to-treat analyses with 6 months lag</b> |               |                   |                               |                              |                   |                                   |
| ACEI/ARB                                             | 1,457         | 250,779           | 2.6 (1.3, 4.3)                | 201                          | 0.9 (0.9, 1.1)    | 1.0 (0.9, 1.1)                    |
| BB                                                   | 924           | 160,867           | 2.4 (1.2, 4.2)                | 206                          | 1.0               | 1.0                               |
| ACEI/ARB                                             | 1,932         | 332,584           | 2.6 (1.3, 4.3)                | 202                          | 0.9 (0.8, 0.9)    | 0.9 (0.8, 1.0)                    |
| CCB                                                  | 706           | 111,696           | 2.4 (1.2, 4.0)                | 234                          | 1.0               | 1.0                               |
| ACEI/ARB                                             | 2,162         | 350,003           | 2.5 (1.2, 4.2)                | 221                          | 1.0 (0.9, 1.1)    | 0.9 (0.8, 1.0)                    |
| THZ                                                  | 526           | 80,691            | 2.8 (1.4, 4.5)                | 216                          | 1.0               | 1.0                               |
| <b>As treated analyses with 6 months lag</b>         |               |                   |                               |                              |                   |                                   |
| ACEI/ARB                                             | 570           | 249,337           | 0.6 (0.3, 1.5)                | 202                          | 0.9 (0.9, 1.1)    | 1.1 (0.9, 1.2)                    |
| BB                                                   | 345           | 159,987           | 0.6 (0.3, 1.4)                | 204                          | 1.0               | 1.0                               |
| ACEI/ARB                                             | 798           | 330,738           | 0.7 (0.3, 1.5)                | 209                          | 0.9 (0.8, 1.0)    | 0.9 (0.8, 1.1)                    |
| CCB                                                  | 296           | 111,149           | 0.6 (0.3, 1.5)                | 237                          | 1.0               | 1.0                               |
| ACEI/ARB                                             | 902           | 348,180           | 0.6 (0.3, 1.5)                | 230                          | 1.1 (0.9, 1.2)    | 0.9 (0.7, 1.1)                    |
| THZ                                                  | 179           | 80,222            | 0.6 (0.3, 1.3)                | 219                          | 1.0               | 1.0                               |

ACEI – Angiotensin Converting Enzyme Inhibitors, ARB – Angiotensin Receptor Blockers, THZ – Thiazide diuretics, CCB – Calcium Channel Blockers, BB – Beta Blockers, HR – hazard ratios, CI – confidence intervals, IQR – interquartile range

<sup>a</sup> New users identified after excluding prevalent users of specific drugs in comparison, i.e., in ACEI/ARB vs. BB pair, prevalent use of CCB and thiazide were allowed.

<sup>b</sup> Incidence rates are per 1,000 population.

<sup>c</sup> Weighted hazard ratios were adjusted for baseline covariates in Table 1. Weighting was implemented by standardized morbidity ratio weighting, where every patient was weighted to reflect covariate distributions in the exposed population (ACEI/ARB).

eTable 14. Duration of prevalent use of antihypertensive drug classes by each comparison of ACEI/ARB vs. specific active comparator in Medicare beneficiaries

| <b>Drugs comparison</b> | <b>Prevalent drug class</b> | <b>Duration (median days)</b> | <b>Interquartile range (first and third quarters)</b> |
|-------------------------|-----------------------------|-------------------------------|-------------------------------------------------------|
| ACEI/ARB                | CCB                         | 272                           | 51, 618                                               |
| BB                      |                             | 301                           | 66, 677                                               |
| ACEI/ARB                | Thiazide                    | 90                            | 31, 325                                               |
| BB                      |                             | 229                           | 55, 497                                               |
| ACEI/ARB                | BB                          | 286                           | 72, 622                                               |
| CCB                     |                             | 324                           | 111, 694                                              |
| ACEI/ARB                | Thiazide                    | 98                            | 32, 381                                               |
| CCB                     |                             | 281                           | 83, 596                                               |
| ACEI/ARB                | CCB                         | 279                           | 56, 628                                               |
| Thiazide                |                             | 341                           | 116, 711                                              |
| ACEI/ARB                | BB                          | 282                           | 68, 616                                               |
| Thiazide                |                             | 302                           | 93, 639                                               |

ACEI – Angiotensin Converting Enzyme Inhibitors, ARB – Angiotensin Receptor Blockers, THZ – Thiazide diuretics, CCB – Calcium Channel Blockers, BB – Beta Blockers

eTable 15. Incidence of colorectal cancer among antihypertensive initiators after varying induction or lag periods, according to intention-to-treat analyses<sup>a</sup>

| Drugs Comparison                   | No. of events | Total sample size | Follow up years (median, IQR) | Incidence rates <sup>b</sup> | Crude HR (95% CI) | Weighted HR (95% CI) <sup>c</sup> |
|------------------------------------|---------------|-------------------|-------------------------------|------------------------------|-------------------|-----------------------------------|
| <b>Intention-to-treat analyses</b> |               |                   |                               |                              |                   |                                   |
| <b>No lag</b>                      |               |                   |                               |                              |                   |                                   |
| ACEI                               | 672           | 128,340           | 2.2 (1.0, 3.9)                | 2.1                          | 1.0 (0.9, 1.1)    | 0.9 (0.8, 1.1)                    |
| BB                                 | 480           | 92,914            | 2.1 (0.9, 3.8)                | 2.1                          | 1.0               | 1.0                               |
| ACEI                               | 672           | 128,340           | 2.2 (1.0, 3.9)                | 2.1                          | 1.0 (0.9, 1.1)    | 1.1 (0.9, 1.3)                    |
| CCB                                | 246           | 47,266            | 2.0 (0.8, 3.6)                | 2.2                          | 1.0               | 1.0                               |
| ACEI                               | 672           | 128,340           | 2.2 (1.0, 3.9)                | 2.1                          | 1.1 (0.9, 1.3)    | 1.1 (0.9, 1.3)                    |
| THZ                                | 169           | 32,922            | 2.5 (1.1, 4.2)                | 1.9                          | 1.0               | 1.0                               |
| <b>1-year lag</b>                  |               |                   |                               |                              |                   |                                   |
| ARB                                | 435           | 95,287            | 2.0 (0.9, 3.5)                | 2.0                          | 1.0 (0.9, 1.2)    | 1.0 (0.9, 1.2)                    |
| BB                                 | 286           | 66,795            | 2.0 (0.9, 3.4)                | 1.9                          | 1.0               | 1.0                               |
| ARB                                | 435           | 95,287            | 2.0 (0.9, 3.5)                | 2.0                          | 1.0 (0.8, 1.2)    | 1.2 (0.9, 1.5)                    |
| CCB                                | 144           | 33,211            | 1.9 (0.8, 3.2)                | 2.1                          | 1.0               | 1.0                               |
| ARB                                | 435           | 95,287            | 2.0 (0.9, 3.5)                | 2.0                          | 1.1 (0.9, 1.3)    | 1.0 (0.7, 1.3)                    |
| THZ                                | 116           | 25,314            | 2.2 (1.1, 3.7)                | 1.9                          | 1.0               | 1.0                               |
| <b>2-year lag</b>                  |               |                   |                               |                              |                   |                                   |
| ARB                                | 274           | 69,651            | 1.8 (0.8, 2.9)                | 2.1                          | 1.3 (1.0, 1.5)    | 1.2 (0.9, 1.5)                    |
| BB                                 | 150           | 48,107            | 1.7 (0.8, 2.9)                | 1.7                          | 1.0               | 1.0                               |
| ARB                                | 274           | 69,651            | 1.8 (0.8, 2.9)                | 2.1                          | 1.0 (0.8, 1.2)    | 1.2 (0.9, 1.6)                    |
| CCB                                | 90            | 23,235            | 1.6 (0.8, 2.8)                | 2.1                          | 1.0               | 1.0                               |
| ARB                                | 274           | 69,651            | 1.8 (0.8, 2.9)                | 2.1                          | 1.0 (0.8, 1.4)    | 1.0 (0.7, 1.3)                    |
| THZ                                | 74            | 19,282            | 1.9 (0.9, 3.0)                | 1.9                          | 1.0               | 1.0                               |

ACEI – Angiotensin Converting Enzyme Inhibitors, ARB – Angiotensin Receptor Blockers, THZ – Thiazide diuretics, CCB – Calcium Channel Blockers, BB – Beta Blockers, HR – hazard ratios, CI – confidence intervals, IQR – interquartile range

<sup>a</sup> New users were identified after excluding prevalent users of specific drugs in comparison, i.e., in ACEI/ARB vs. BB pair, prevalent use of CCB and thiazide were allowed.

<sup>b</sup> Incidence rates are per 1,000 population.

<sup>c</sup> Weighted hazard ratios were adjusted for baseline covariates in Table 1. Weighting was implemented by standardized morbidity ratio weighting, where every patient was weighted to reflect covariate distributions in the exposed population (ACEI/ARB).

eTable 16. Incidence of colorectal cancer among antihypertensive initiators after varying induction or lag periods, according to as treated analyses<sup>a</sup>

| Drugs Comparison           | No. of events | Total sample size | Follow up years (median, IQR) | Incidence rates <sup>b</sup> | Crude HR (95% CI) | Weighted HR (95% CI) <sup>c</sup> |
|----------------------------|---------------|-------------------|-------------------------------|------------------------------|-------------------|-----------------------------------|
| <b>As treated analyses</b> |               |                   |                               |                              |                   |                                   |
| <b>No lag</b>              |               |                   |                               |                              |                   |                                   |
| ACEI                       | 266           | 128,335           | 0.6 (0.3, 1.4)                | 2.0                          | 0.9 (0.8, 1.1)    | 0.9 (0.7, 1.1)                    |
| BB                         | 192           | 92,119            | 0.5 (0.2, 1.3)                | 2.1                          | 1.0               | 1.0                               |
| ACEI                       | 272           | 128,335           | 0.6 (0.3, 1.4)                | 2.0                          | 0.8 (0.6, 1.0)    | 0.9 (0.7, 1.1)                    |
| CCB                        | 122           | 47,266            | 0.6 (0.2, 1.3)                | 2.5                          | 1.0               | 1.0                               |
| ACEI                       | 278           | 128,335           | 0.6 (0.3, 1.4)                | 2.1                          | 1.1 (0.9, 1.5)    | 1.0 (0.6, 1.4)                    |
| THZ                        | 57            | 32,921            | 0.5 (0.2, 1.2)                | 1.8                          | 1.0               | 1.0                               |
| <b>1-year lag</b>          |               |                   |                               |                              |                   |                                   |
| ARB                        | 197           | 94,210            | 0.6 (0.3, 1.3)                | 2.1                          | 1.0 (0.8, 1.3)    | 1.0 (0.8, 1.3)                    |
| BB                         | 129           | 66,012            | 0.5 (0.2, 1.3)                | 2.1                          | 1.0               | 1.0                               |
| ARB                        | 199           | 94,210            | 0.6 (0.3, 1.4)                | 2.1                          | 1.0 (0.7, 1.3)    | 1.2 (0.9, 1.5)                    |
| CCB                        | 69            | 32,830            | 0.6 (0.2, 1.3)                | 2.1                          | 1.0               | 1.0                               |
| ARB                        | 205           | 94,210            | 0.6 (0.3, 1.3)                | 2.2                          | 1.0 (0.7, 1.3)    | 0.8 (0.5, 1.2)                    |
| THZ                        | 52            | 24,997            | 0.5 (0.2, 1.2)                | 2.2                          | 1.0               | 1.0                               |
| <b>2-year lag</b>          |               |                   |                               |                              |                   |                                   |
| ARB                        | 131           | 68,055            | 0.6 (0.3, 1.2)                | 2.1                          | 1.2 (0.9, 1.5)    | 1.1 (0.8, 1.5)                    |
| BB                         | 75            | 47,016            | 0.5 (0.2, 1.1)                | 1.8                          | 1.0               | 1.0                               |
| ARB                        | 137           | 68,055            | 0.6 (0.3, 1.3)                | 2.2                          | 1.0 (0.7, 1.5)    | 1.4 (0.9, 2.0)                    |
| CCB                        | 43            | 22,681            | 0.5 (0.2, 1.3)                | 2.1                          | 1.0               | 1.0                               |
| ARB                        | 136           | 68,055            | 0.6 (0.3, 1.2)                | 2.2                          | 1.0 (0.7, 1.5)    | 1.0 (0.6, 1.6)                    |
| THZ                        | 34            | 18,832            | 0.5 (0.2, 1.1)                | 2.1                          | 1.0               | 1.0                               |

ACEI – Angiotensin Converting Enzyme Inhibitors, ARB – Angiotensin Receptor Blockers, THZ – Thiazide diuretics, CCB – Calcium Channel Blockers, BB – Beta Blockers, HR – hazard ratios, CI – confidence intervals, IQR – interquartile range

<sup>a</sup> New users were identified after excluding prevalent users of specific drugs in comparison, i.e., in ACEI/ARB vs. BB pair, prevalent use of CCB and thiazide were allowed.

<sup>b</sup> Incidence rates are per 1,000 population.

<sup>c</sup> Weighted hazard ratios were adjusted for baseline covariates in Table 1. Weighting was implemented by standardized morbidity ratio weighting, where every patient was weighted to reflect covariate distributions in the exposed population (ACEI/ARB).
